# Supplementary material for: A contaminant-free assessment of Endogenous Retroviral RNA in human plasma
Source: PubMed Central journal article supplement (PMC5027517; doi:10.1038/srep33598), 2016-09-19

## Supplementary Material

### **A contaminant-free assessment of Endogenous Retroviral RNA in human plasma**

Timokratis Karamitros<sup>1</sup>, Dimitrios Paraskevis<sup>2</sup>, Angelos Hatzakis<sup>2</sup>, Mina Psychogiou<sup>3</sup>, Ioannis Elefsiniotis<sup>4</sup>, Tara Hurst<sup>1</sup>, Anna-Maria Geretti<sup>5</sup>, Apostolos Beloukas<sup>5</sup>, John Frater<sup>6</sup>, Paul Klenerman<sup>6</sup>, Aris Katzourakis<sup>1</sup>, Gkikas Magiorkinis<sup>1#</sup>

1.Department of Zoology, University of Oxford

2.Department of Hygiene, Epidemiology and Medical Statistics, Medical School, University of Athens

3.First Department of Internal Medicine, Medical School, University of Athens

4.Academic Department of Internal Medicine-Hepatogastroenterology, General and Oncology Hospital 'Agioi Anargyroi'

5.Institute of Infection and Global Health, University of Liverpool, 6.Nuffield Department of Medicine, University of Oxford

#Corresponding Author: Gkikas Magiorkinis: [gkikas.magiorkinis@zoo.ox.ac.uk](mailto:gkikas.magiorkinis@zoo.ox.ac.uk)

e-mail addresses: [timokratis.karamitros@zoo.ox.ac.uk](mailto:timokratis.karamitros@zoo.ox.ac.uk), [dparas@med.uoa.gr](mailto:dparas@med.uoa.gr), [ahatzak@med.uoa.gr](mailto:ahatzak@med.uoa.gr), [mpsichog@yahoo.gr](mailto:mpsichog@yahoo.gr), [ielefs@nurs.uoa.gr](mailto:ielefs@nurs.uoa.gr), [tara.hurst@zoo.ox.ac.uk](mailto:tara.hurst@zoo.ox.ac.uk), [A.M.Geretti@liverpool.ac.uk](mailto:A.M.Geretti@liverpool.ac.uk), [A.Beloukas@liverpool.ac.uk](mailto:A.Beloukas@liverpool.ac.uk), [john.frater@ndm.ox.ac.uk](mailto:john.frater@ndm.ox.ac.uk), [paul.klenerman@medawar.ox.ac.uk](mailto:paul.klenerman@medawar.ox.ac.uk), [aris.katzourakis@zoo.ox.ac.uk](mailto:aris.katzourakis@zoo.ox.ac.uk), [gkikas.magiorkinis@zoo.ox.ac.uk](mailto:gkikas.magiorkinis@zoo.ox.ac.uk)

**Suppl. Table 1:** Sensitivity of the assay in biological material. Absolute quantification of HK2 pol in undiluted and in log10-serial-diluted NCCIT cell-supernatant in HIV plasma (spiking).

| Type                            | Cq    | Amplification | Estimated<br>copies/reaction | Average<br>copies/re<br>action | Estimated* | Expected**  |
|---------------------------------|-------|---------------|------------------------------|--------------------------------|------------|-------------|
|                                 |       |               |                              |                                | copies/ml  | copies/ml   |
| NCCIT SUPERNATANT               | 30.86 | TRUE          | 4397.14                      | 4236.33                        | 101672     |             |
| NCCIT SUPERNATANT               | 31.92 | TRUE          | 2073.52                      |                                |            |             |
| NCCIT SUPERNATANT               | 30.37 | TRUE          | 6238.33                      |                                |            |             |
| SUPERNAT plasmaSpike 1/10       | 35.10 | TRUE          | 216.39                       | 346.11                         | 8307       | 10167       |
| SUPERNAT plasmaSpike 1/10       | 34.10 | TRUE          | 440.31                       |                                |            |             |
| SUPERNAT plasmaSpike 1/10       | 34.30 | TRUE          | 381.62                       |                                |            |             |
|                                 |       |               |                              |                                |            |             |
|                                 |       |               |                              |                                |            |             |
| SUPERNAT plasmaSpike 1/100      | 37.19 | TRUE          | 48.97                        | 27.63                          | <b>663</b> | <b>1017</b> |
| SUPERNAT plasmaSpike 1/100      | 39.11 | TRUE          | 12.51                        |                                |            |             |
| SUPERNAT plasmaSpike 1/100      | 38.35 | TRUE          | 21.41                        |                                |            |             |
| SUPERNAT plasmaSpike 1/1000     | 39.64 | TRUE          | 8.57                         | 7.67                           | 184        | 102         |
| SUPERNAT plasmaSpike 1/1000     | 39.97 | TRUE          | 6.77                         |                                |            |             |
| SUPERNAT plasmaSpike 1/1000     |       | FALSE         |                              |                                |            |             |
|                                 |       |               |                              |                                |            |             |
|                                 |       |               |                              |                                |            |             |
| Standard, 10000 copies/reaction | 30.23 | TRUE          | 6863.48                      | 10590.70                       |            |             |
| Standard, 10000 copies/reaction | 29.20 | TRUE          | 14317.92                     |                                |            |             |
| Standard, 1000 copies/reaction  | 32.63 | TRUE          | 1251.27                      | 1039.42                        |            |             |
| Standard, 1000 copies/reaction  | 33.21 | TRUE          | 827.56                       |                                |            |             |
| Standard, 100 copies/reaction   | 36.61 | TRUE          | 73.71                        | 103.52                         |            |             |
| Standard, 100 copies/reaction   | 35.78 | TRUE          | 133.33                       |                                |            |             |
| Negative                        |       | FALSE         |                              |                                |            |             |

\* Rounded, based on the formula presented in Suppl. Figure 1.

\*\*Expected copies after plasma spiking

**Suppl. Figure 1:** Calculation of equivalence between copies/reaction and copies/ml plasma

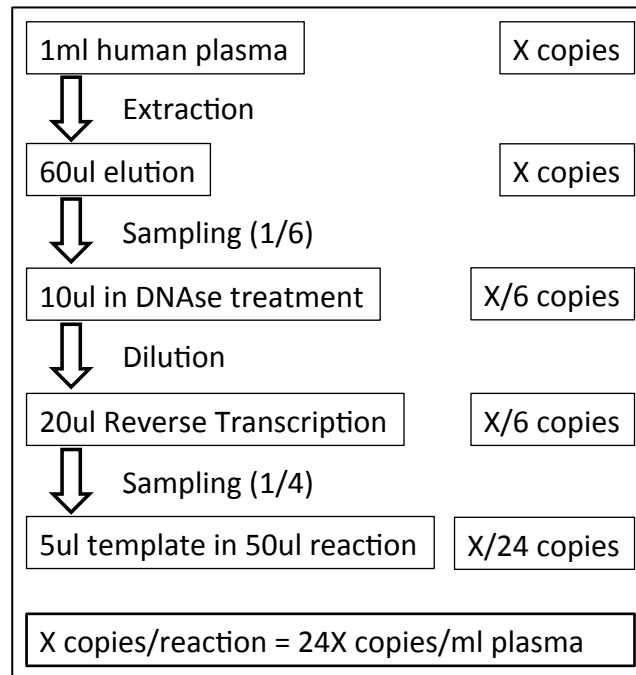

**Suppl. Figure 2:** Temperature log during the transport of the plasma samples from Greece to the United Kingdom. Dry ice was replenished during the shipment.

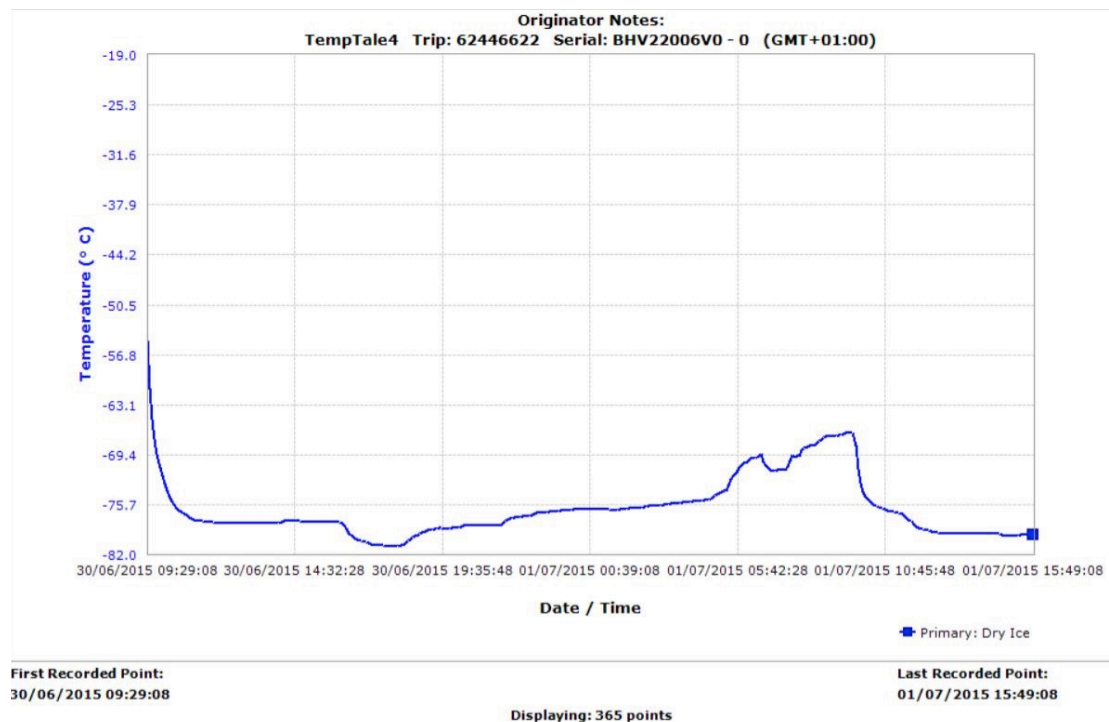

**Suppl. Figure 3:** SYBR-Green quantification of 14 HIV samples and comparison with pre-shipment measurements. Standards were built after absolute quantification of PCR amplicon with PicoGreen.

**A) Standard Curve (E=1.922, r<sup>2</sup>=0.9961)**

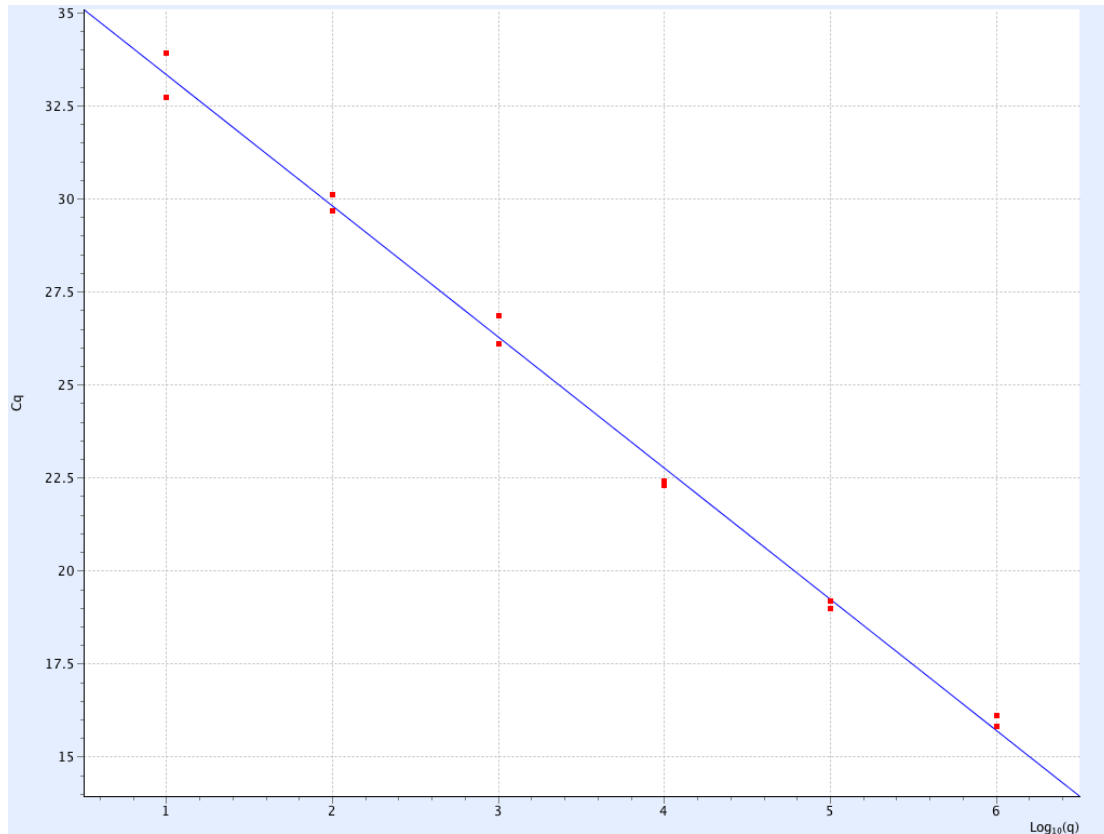

**B) Pre- / post- shipment quantification**

| Sample | SYBR-green<br>copies/reaction | Estimated*<br>copies/ml | pre-shipment<br>copies/ml |
|--------|-------------------------------|-------------------------|---------------------------|
| HIV29  | 2.55E+00                      | 6.13E+01                | 5.48E+01                  |
| HIV30  | 1.47E+02                      | 3.52E+03                | 3.23E+03                  |
| HIV31  | 6.45E+00                      | 1.55E+02                | 1.78E+02                  |
| HIV32  | 8.04E+00                      | 1.93E+02                | 2.70E+02                  |
| HIV33  | 9.73E+02                      | 2.34E+04                | 4.33E+04                  |
| HIV34  | 3.81E+04                      | 9.14E+05                | 3.06E+05                  |
| HIV35  | 1.42E+03                      | 3.41E+04                | 3.70E+04                  |
| HIV36  | 3.19E+02                      | 7.66E+03                | 1.08E+04                  |
| HIV37  | 8.91E+02                      | 2.14E+04                | 3.55E+04                  |
| HIV38  | 1.06E+02                      | 2.54E+03                | 2.96E+03                  |
| HIV39  | 4.71E+02                      | 1.13E+04                | 1.34E+04                  |
| HIV40  | 1.23E+03                      | 2.95E+04                | 4.49E+04                  |
| HIV41  | 7.65E+00                      | 1.84E+02                | 1.84E+02                  |
| HIV42  | 6.05E+02                      | 1.45E+04                | 3.38E+04                  |

\* Based on the formula presented in Suppl. Figure 1.

C) Regression line of pre- vs. post- shipment HIV viral loads (log10-transformed values). The 95% confidence intervals of the intercept and the slope were -0.5008 to 0.3388 and 0.8945 to 1.110 respectively.

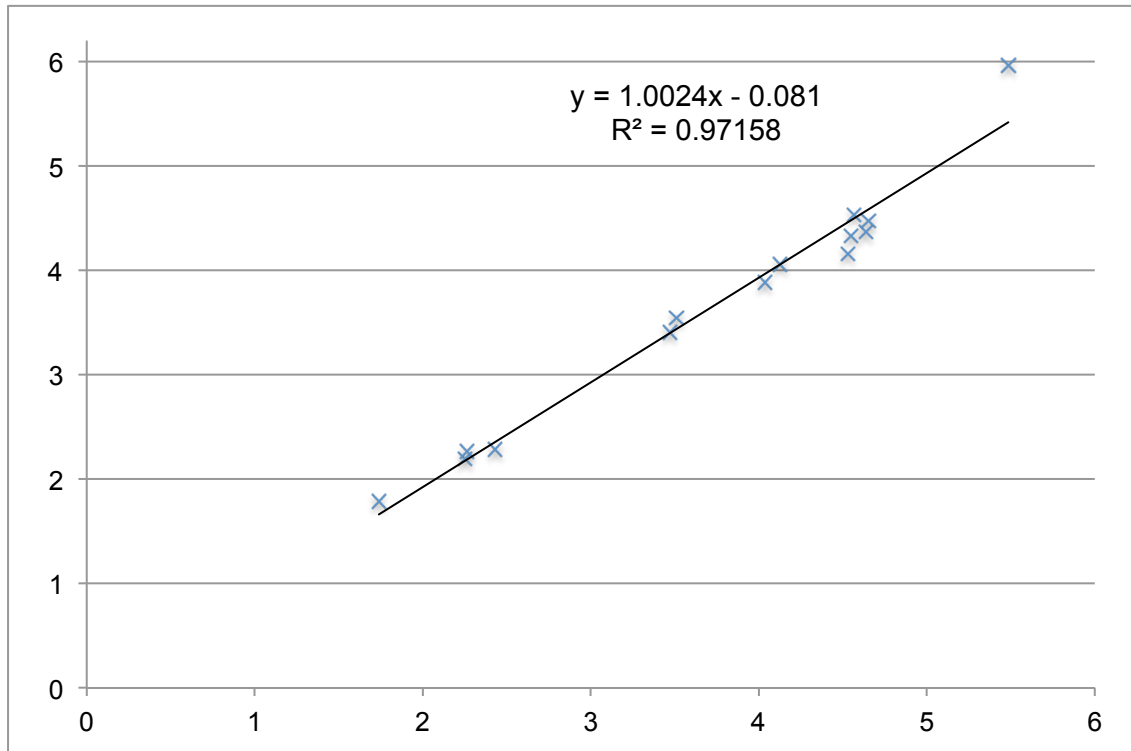

**Suppl. Figure 4:** Absolute quantification total RNA with Ribogreen. RNA extracted from 14 HIV samples (1 ml plasma) was DNase treated and quantified using the kit-included rRNA standards.

### Standard Curve

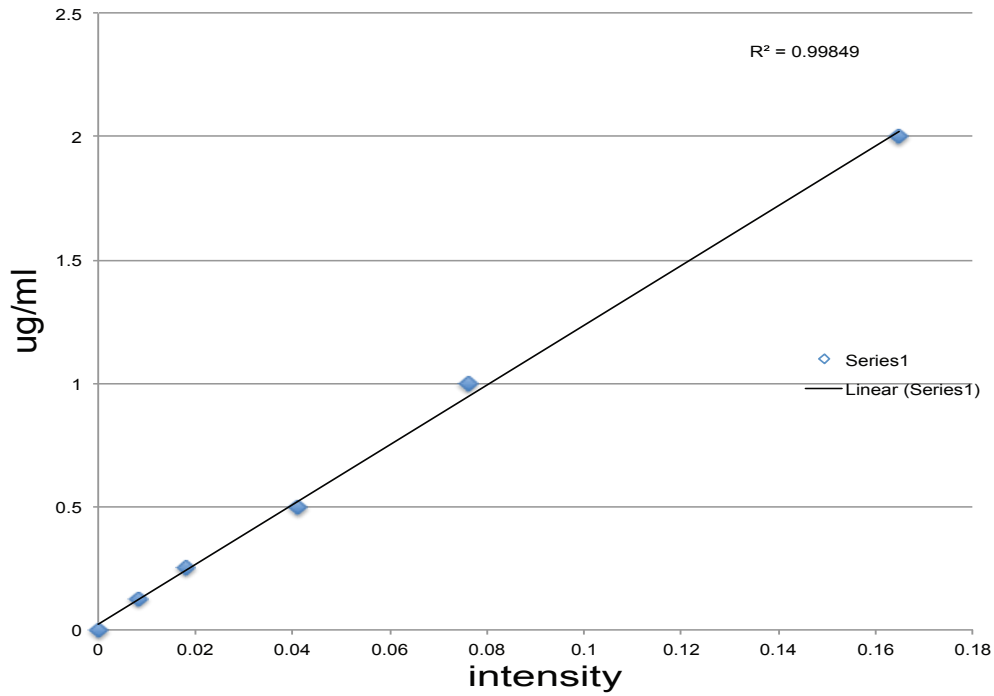

### Total RNA in 14-HIV samples

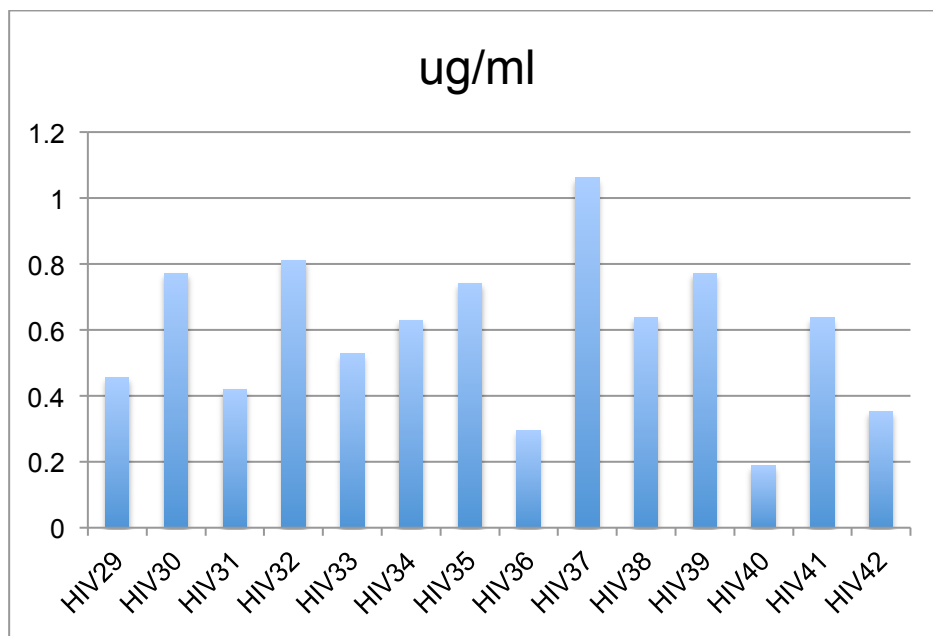

Supplement: srep33598-s1.pdf [file srep33598-s1.pdf]
